# Supplementary material
Source: publisher figshare collection journal article supplement (https://acs.figshare.com/ndownloader/files/4066594)
Supplement: Supplementary file 1 [file 4066594]

# Supporting Information

## Fabrication of Pores in a Silicon Carbide Wafer by Electrochemical Etching with a Glassy-Carbon Needle Electrode

*Tomohiko Sugita, Kazuki Hiramatsu, Shigeru Ikeda and Michio Matsumura\**

Research Center for Solar Energy Chemistry, Osaka University, 1-3 Machikaneyama, Toyonaka, Osaka  
560-8531, Japan

\*CORRESPONDING AUTHOR E-mail: [matsu@chem.es.osaka-u.ac.jp](mailto:matsu@chem.es.osaka-u.ac.jp)

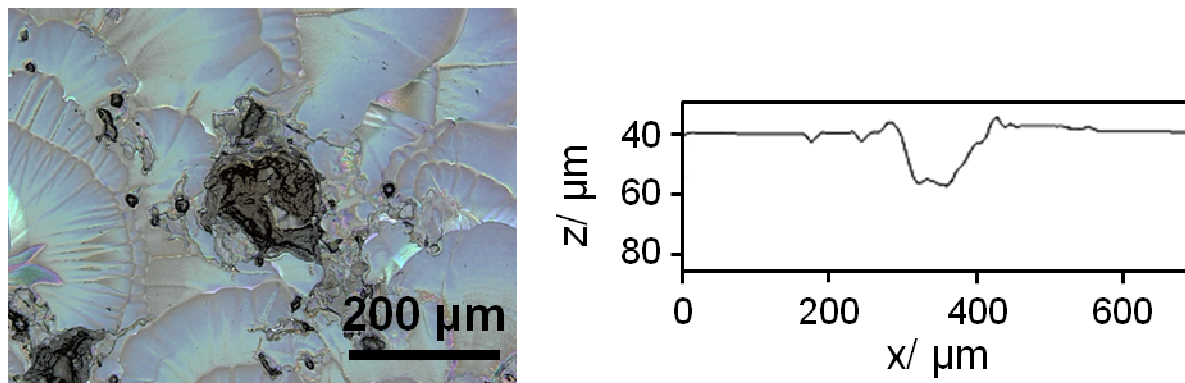

Figure S1. Plan-view micrograph and the depth profile of a pore formed in SiC by electrochemical processing for 5 h with a GC electrode in  $20 \text{ mol dm}^{-3}$  HF solution containing  $\text{K}_2\text{SO}_4$  at a concentration of  $3 \text{ mol dm}^{-3}$ . The potential applied to the GC electrode was 10 V vs Ag/AgCl. Depth profile of the pore is shown along a line passing through the center of the pore.
